# Supplementary material for: Insights into cannabinoid receptor 2 (CB2) anterograde trafficking and pharmacological chaperoning
Source: Springer Nature journal article supplement (doi:10.1007/s00018-025-05961-w), 2025-11-22
Supplement: MOESM1 [file 18_2025_5961_MOESM1_ESM.pdf]

## **Insights into Cannabinoid Receptor 2 (CB2) anterograde trafficking and pharmacological chaperoning**

Caitlin RM Oyagawa <sup>1,2</sup>, Braden Woodhouse <sup>1,2,3</sup>, Karren C Wood <sup>1,2</sup>, Michelle Glass <sup>1,2,4,5</sup>, Natasha L Grimsey \* <sup>1,2,5</sup>

<sup>1</sup> Department of Pharmacology and Clinical Pharmacology, School of Medical Sciences, Faculty of Medical and Health Sciences, University of Auckland, Auckland, New Zealand

<sup>2</sup> Centre for Brain Research, Faculty of Medical and Health Sciences, University of Auckland, Auckland, New Zealand

<sup>3</sup> Department of Oncology, School of Medical Sciences, Faculty of Medical and Health Sciences, University of Auckland, Auckland, New Zealand

<sup>4</sup> Department of Pharmacology and Toxicology, School of Biomedical Sciences, University of Otago, Dunedin, New Zealand

<sup>5</sup> Maurice Wilkins Centre for Molecular Biodiscovery, New Zealand

\* Correspondence: [n.grimsey@auckland.ac.nz](mailto:n.grimsey@auckland.ac.nz) (N L Grimsey)

### **Supplementary Figures**

### Supplementary Fig. 1

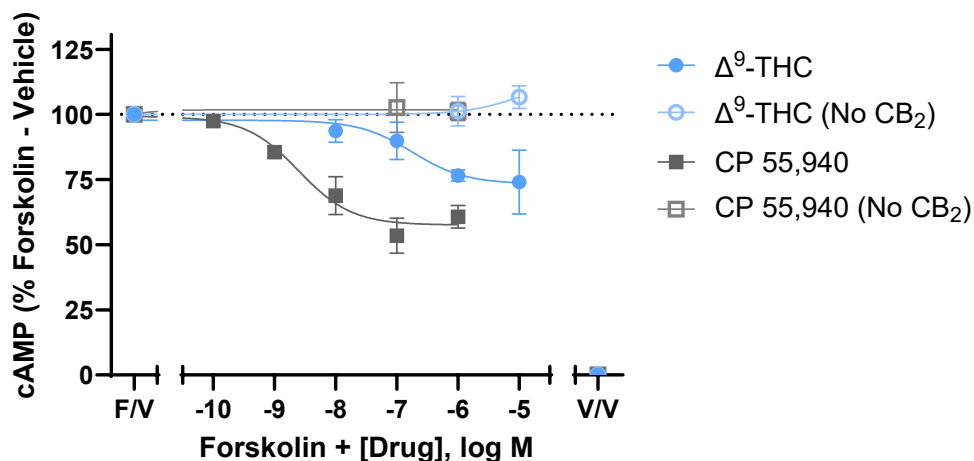

### Supplementary Fig. 1 CB<sub>2</sub> wt cAMP response to Δ<sup>9</sup>-THC and CP 55,940

Cells stably expressing CB<sub>2</sub> wt (or untransfected cells, “No CB<sub>2</sub>”) were treated with forskolin (5 μM) and a dilution series of Δ<sup>9</sup>-THC or CP 55,940. Cyclic AMP (cAMP) responses were measured as the mean BRET ratio from the CAMYEL biosensor during a 10 minute stimulation, then normalised to forskolin with vehicle (100%; “F/V”) and vehicle-only control (0%, “V/V”). Data are presented as mean ± SEM from three independent experiments.

## Supplementary Fig. 2

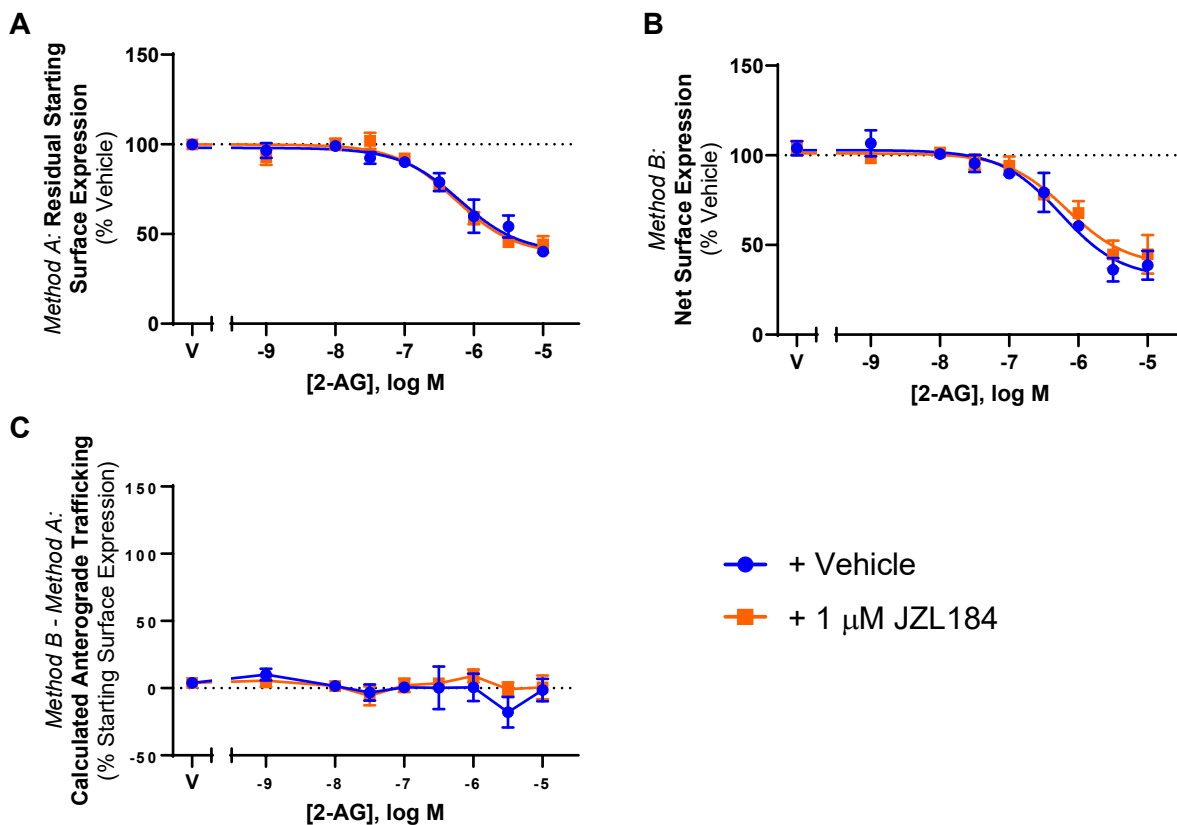

### Supplementary Fig. 2 CB<sub>2</sub> wt trafficking in response to 2-AG +/- MAGL inhibitor, JZL184

Cells stably expressing CB<sub>2</sub> wt were treated with a dilution series of 2-AG +/- 1 μM JZL184 for 3 hours, and were labelled to measure (A) residual starting surface expression (*Method A*) or (B) net surface expression (*Method B*). (C) Calculated anterograde trafficking (*Method B* – *Method A*). Data are presented as mean ± SEM from three independent experiments.
